# Supplementary material
Source: publisher figshare collection journal article supplement (https://karger.figshare.com/articles/dataset/_/5122429)
Supplement: Supplementary file 1 [file 1]

Supplementary Material


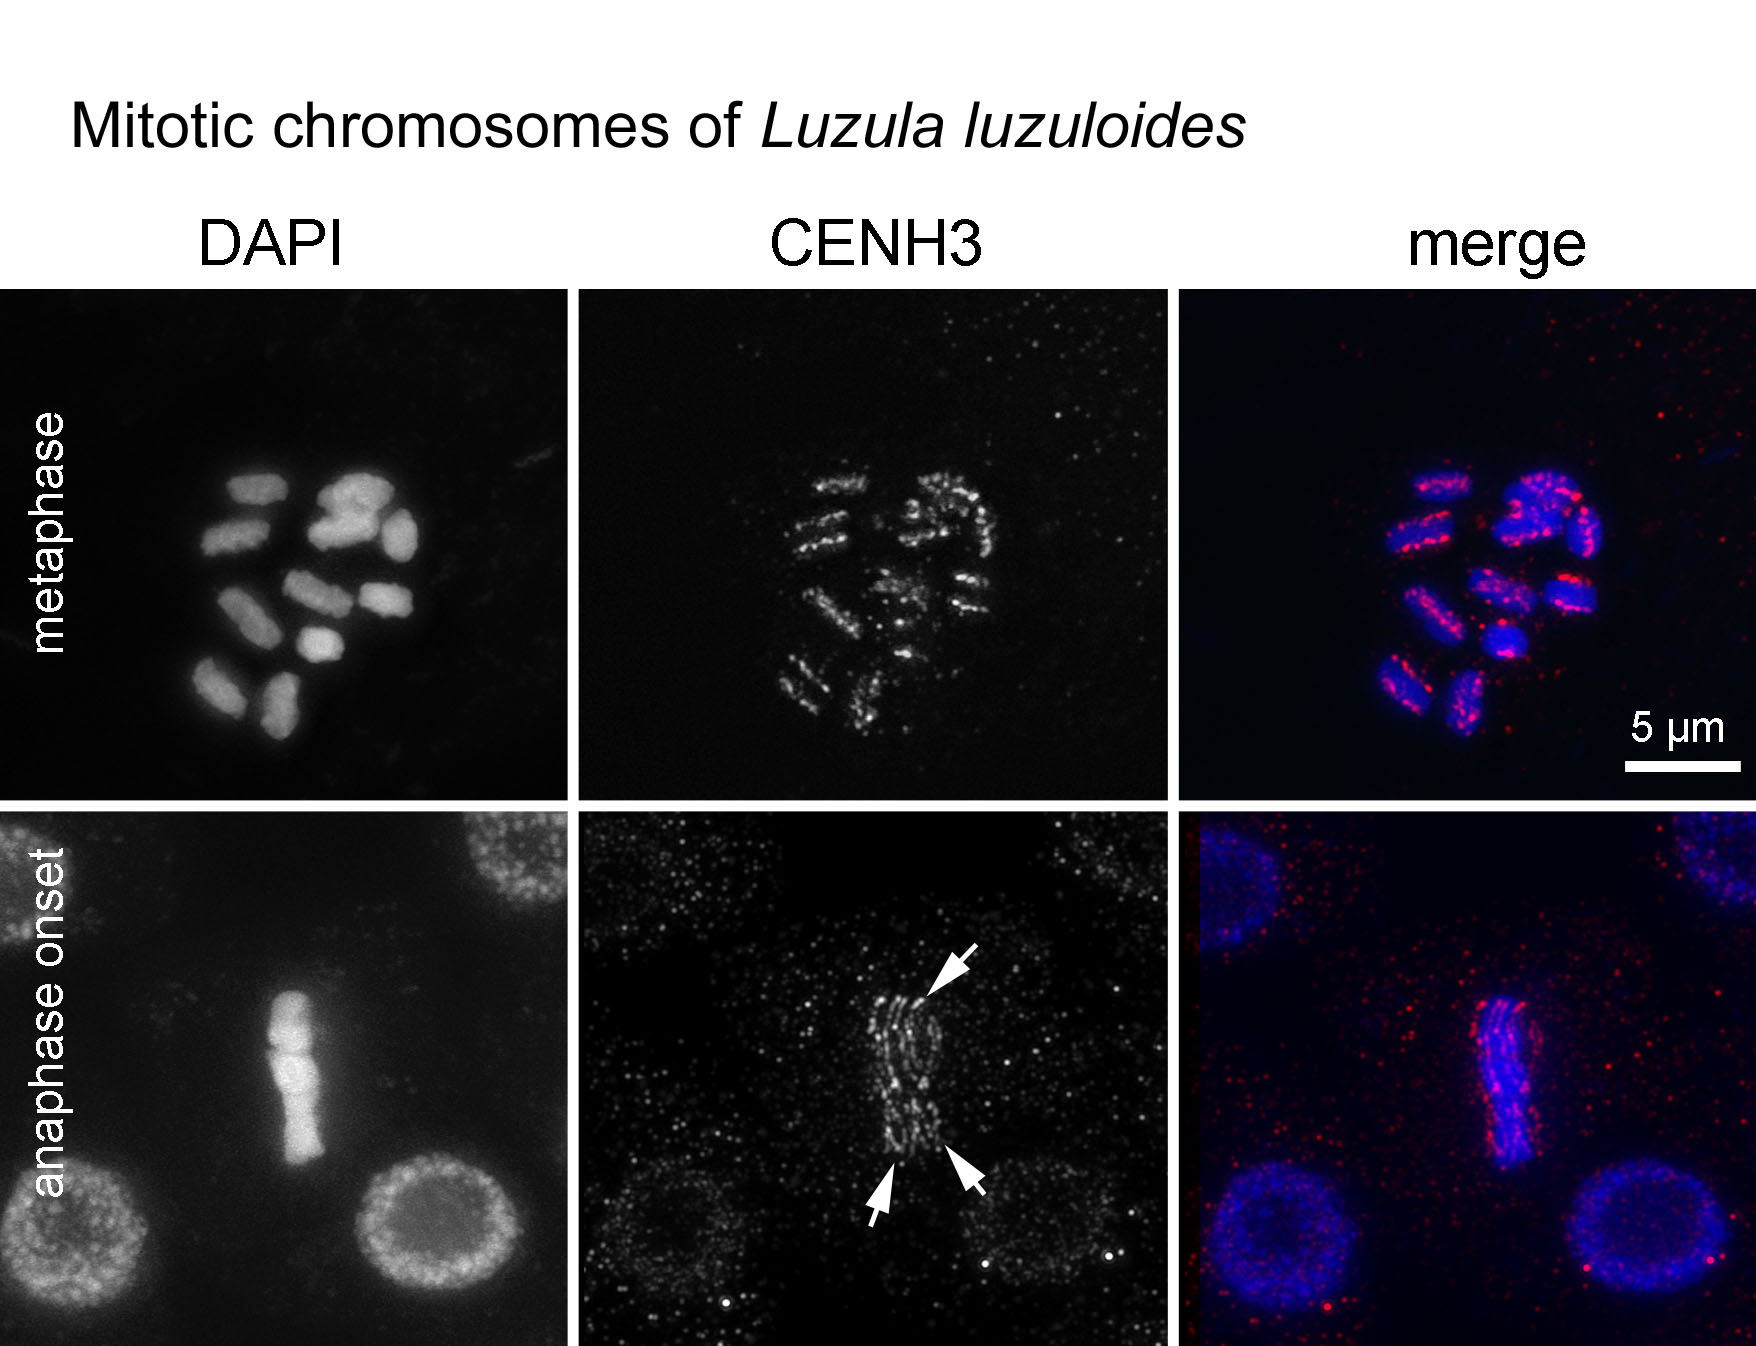


Supplementary. Fig. 1


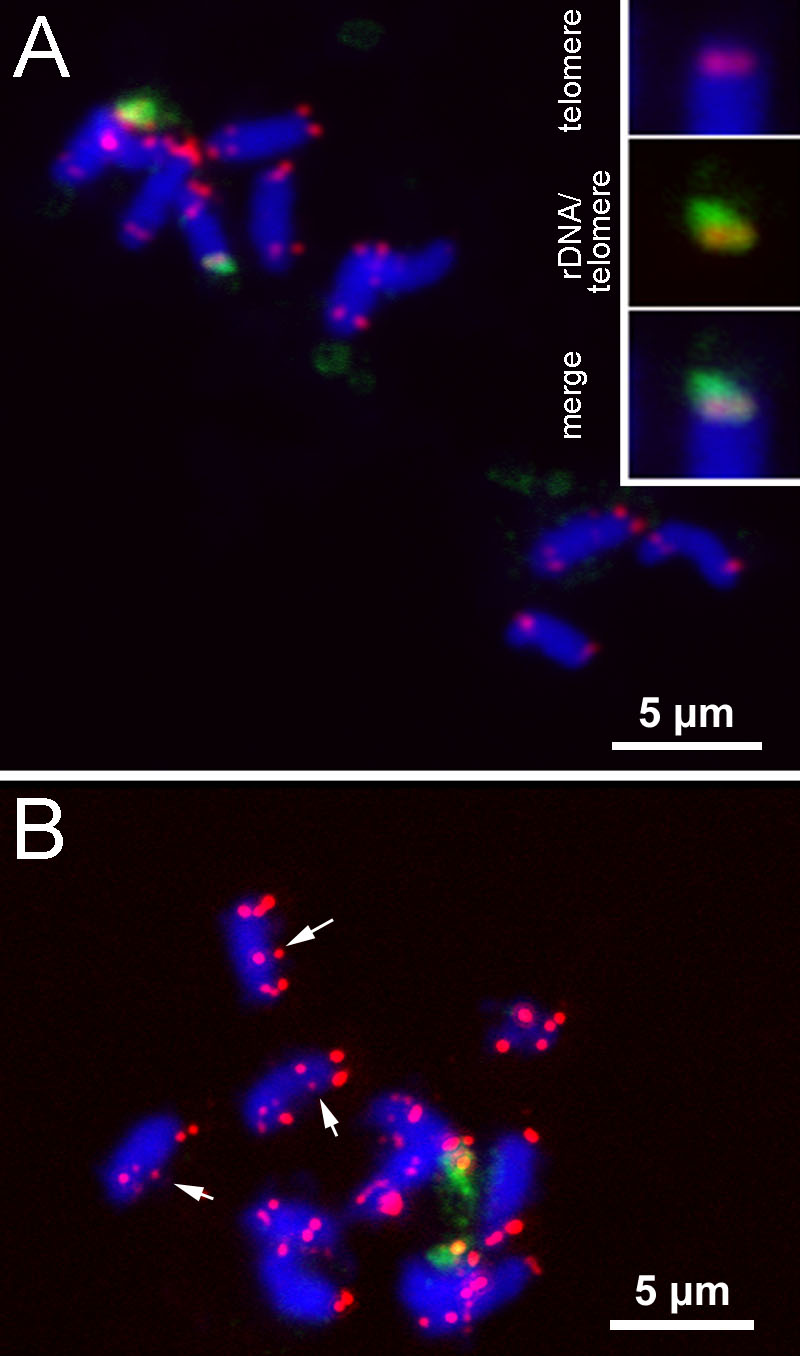


Supplementary Fig. 2

Supplementary Fig. 1

Morphology of mitotic *L. luzuloides* chromosomes during metaphase and at metaphase/anaphase transition. DAPI stained chromosomes are shown in *blue* and CENH3 signals are in *red*. Although the relatively small *L. luzuloides* chromosomes formed at metaphase/anaphase transition an indistinguishable mass of chromosomes, bending of chromosomes was indirectly visible via curved linear CENH3 signals (*arrows*) at this stage.

Supplementary Fig. 2

Mitotic metaphase chromosomes of *L. luzuloides* after FISH (a, b) with 45S rDNA (*green*) and *Arabidopsis*-type telomere probes (*red*). DAPI stained chromosomes are shown in *blue*. (b) Notably, interstitial telomeric sites were detected on some chromosomes (marked by *arrows*) when CCD camera was long time exposed.

Supplementary Video 1

Picture rotation of CENH3- and DAPI-labeled metaphase chromosomes of *L. elegans* recorded with deconvolution fluorescent light microscopy. Picture rotation visualizes a longitudinal groove along the poleward surface of each sister chromatid in DAPI (*yellow*). Linear-like CENH3 signal pairs (*yellow*) demonstrating localization on both sister chromatids colocalizing with the groove. Note that terminal chromosomal ends are groove- and CENH3-free.

Supplementary Video 2

Picture rotation of CENH3-labeled chromosomes of *L. elegans* at metaphase/anaphase transition recorded with deconvolution fluorescent light microscopy. Curved linear CENH3 signals (*yellow*) indicating chromosome bending during metaphase/anaphase transition.
